# Supplementary material
Source: Springer Nature journal article supplement (https://www.springermedizin.de/resource/supplementary/12885_2012_3652_MOESM6_ESM.pdf/9463764)

**a**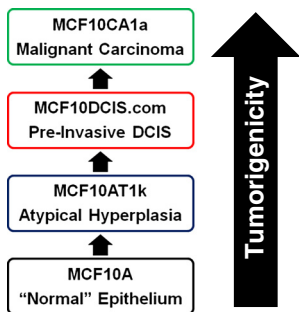**b**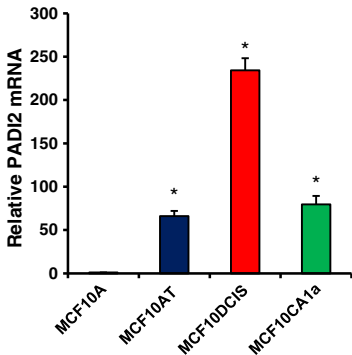**c**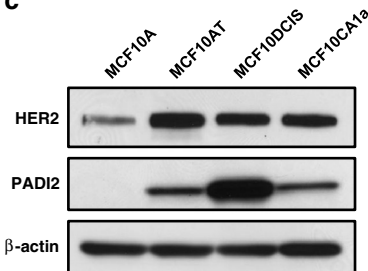**d**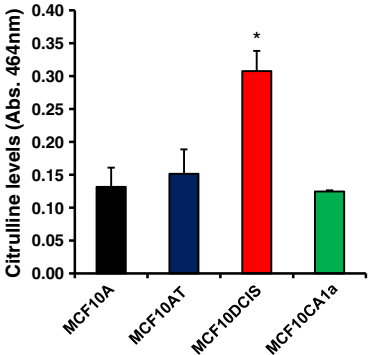

Supplement: MOESM6 [file 9463764]
